# Supplementary material for: Exploring the Effects of Ixekizumab on Pain in Patients with Ankylosing Spondylitis Based on Objective Measures of Inflammation: Post Hoc Analysis from a Large Randomized Clinical Trial
Source: Springer Nature journal article supplement (doi:10.1007/s40744-024-00660-7), 2024-04-18

## SUPPLEMENTARY MATERIAL

### Exploring the Effects of Ixekizumab on Pain in Patients with Ankylosing Spondylitis Based on Objective Measures of Inflammation: Post-Hoc Analysis from a Large Randomized Clinical Trial

Kurt de Vlam<sup>1</sup>, Walter P. Maksymowych<sup>2</sup>, Gaia Gallo<sup>3</sup>, Proton Rahman<sup>4</sup>, Philip Mease<sup>5</sup>, Venkatesh Krishnan<sup>3</sup>, Conor J. McVeigh<sup>3</sup>, Jeffrey Lisse<sup>3</sup>, Danting Zhu<sup>3</sup>, Rebecca J. Bolce<sup>3</sup>, Philip G. Conaghan<sup>6</sup>

#### Affiliations:

<sup>1</sup>University Hospital Leuven, Leuven, Belgium

<sup>2</sup>Department of Medicine, Division of Rheumatology at the University of Alberta, Alberta, Canada

<sup>3</sup>Eli Lilly and Company, Indianapolis, United States of America

<sup>4</sup>Department of Medicine, Memorial University, St. John's, Newfoundland A1C 5B8, Canada

<sup>5</sup>Swedish Medical Center/Providence St. Joseph Health and University of Washington, Seattle, Washington, United States of America

<sup>6</sup>Leeds Institute of Rheumatic and Musculoskeletal Medicine, University of Leeds, and NIHR Leeds Biomedical Research Centre, United Kingdom

**Corresponding Author:** Kurt de Vam

**Email Address:** [kurt.devlam@uzleuven.be](mailto:kurt.devlam@uzleuven.be)

**Keywords:** IL-17; Pain; Inflammation; Rheumatic Disease; Spondylitis, Ankylosing

**Trial Protocol:** [Prot\\_000.pdf \(clinicaltrials.gov\)](#)

**Statistical Analysis Plan:** [SAP\\_001.pdf \(clinicaltrials.gov\)](#)

**Table S1. Baseline demographics and disease characteristics of participants in COAST-V**

|                                                          | <b>Placebo<br/>N=87<sup>a</sup></b> | <b>Adalimumab<br/>Q2W<br/>N=90</b> | <b>Ixekizumab<br/>Q2W<br/>N=83</b> | <b>Ixekizumab<br/>Q4W<br/>N=81</b> |
|----------------------------------------------------------|-------------------------------------|------------------------------------|------------------------------------|------------------------------------|
| <b>Age (years)</b>                                       | 42.7 (12.0)                         | 41.8 (11.4)                        | 41.3 (11.2)                        | 41.0 (12.1)                        |
| <b>Sex, n (%)</b>                                        |                                     |                                    |                                    |                                    |
| <b>Male</b>                                              | 71<br>(82.6%)                       | 73 (81.1%)                         | 64 (77.1%)                         | 68 (84.0%)                         |
| <b>Female</b>                                            | 15<br>(17.4%)                       | 17 (18.9%)                         | 19 (22.9%)                         | 13 (16.0%)                         |
| <b>Race, n (%)</b>                                       |                                     |                                    |                                    |                                    |
| <b>White</b>                                             | 52 (60.5%)                          | 57 (63.3%)                         | 52 (62.7%)                         | 52 (64.2%)                         |
| <b>Asian</b>                                             | 28 (32.6%)                          | 29 (32.2%)                         | 25 (30.1%)                         | 25 (30.9%)                         |
| <b>Other</b>                                             | 6 (7.0%)                            | 4 (4.4%)                           | 6 (7.2%)                           | 4 (4.9%)                           |
| <b>Weight (kg)</b>                                       | 79.9 (17.1)                         | 78.2 (17.2)                        | 76.6 (13.8)                        | 77.6 (14.7)                        |
| <b>&lt;70 kg, n (%)</b>                                  | 25 (29.1)                           | 29 (32.2)                          | 29 (34.9)                          | 24 (29.6)                          |
| <b>≥70 kg, n (%)</b>                                     | 61 (70.9)                           | 61 (67.8)                          | 54 (65.1)                          | 57 (70.4)                          |
| <b>Age of onset of AxSpA (years)</b>                     | 26.4 (8.4)                          | 26.5 (8.6)                         | 25.8 (8.2)                         | 25.4 (7.7)                         |
| <b>Duration of symptoms since AxSpA onset (years)</b>    | 16.6 (10.1)                         | 15.6 (9.3)                         | 15.8 (10.6)                        | 15.8 (11.2)                        |
| <b>Duration of disease since AxSpA diagnosis (years)</b> | 6.8 (7.6)                           | 7.5 (7.5)                          | 8.2 (9.0)                          | 8.3 (9.6)                          |
| <b>Positive for HLA-B27</b>                              | 76 (89.4%)                          | 82 (91.1%)                         | 75 (90.4%)                         | 75 (92.6%)                         |
| <b>NSAID use at baseline, n (%)</b>                      | 78 (90.7%)                          | 83 (92.2%)                         | 79 (95.2%)                         | 72 (88.9%)                         |
| <b>csDMARDs use at baseline, n (%)</b>                   | 31 (36.0%)                          | 32 (35.6%)                         | 29 (34.9%)                         | 33 (40.7%)                         |
| <b>Sulfasalazine, n (%)</b>                              | 23 (26.7%)                          | 25 (27.8%)                         | 25 (30.1%)                         | 24 (29.6%)                         |
| <b>Methotrexate, n (%)</b>                               | 8 (9.3%)                            | 8 (8.9%)                           | 4 (4.8%)                           | 9 (11.1%)                          |
| <b>Patient global assessment of disease activity NRS</b> | 7.1 (1.7)                           | 7.1 (1.7)                          | 7.1 (1.6)                          | 6.9 (1.5)                          |
| <b>CRP (mg/L)</b>                                        | 16.0 (21.0)                         | 12.5 (17.6)                        | 13.4 (15.3)                        | 12.2 (13.3)                        |
| <b>CRP &gt;5 mg/L, n (%)</b>                             | 60 (69.8)                           | 52 (57.8)                          | 55 (66.3)                          | 52 (64.2)                          |
| <b>ASDAS</b>                                             | 3.9 (0.7)                           | 3.7 (0.8)                          | 3.8 (0.8)                          | 3.7 (0.7)                          |
| <b>BASDAI</b>                                            | 6.8 (1.2)                           | 6.7 (1.5)                          | 6.7 (1.6)                          | 6.8 (1.3)                          |
| <b>BASFI</b>                                             | 6.4 (1.9)                           | 6.1 (2.1)                          | 6.3 (2.1)                          | 6.1 (1.8)                          |
| <b>ASAS Health Index</b>                                 | 8.1 (3.5)                           | 8.2 (3.7)                          | 8.4 (3.6)                          | 7.5 (3.3)                          |
| <b>SF-36 PCS</b>                                         | 32.0 (8.3)                          | 33.5 (8.3)                         | 34.1 (7.6)                         | 34.0 (7.5)                         |
| <b>MRI SPARCC Spine</b>                                  | 15.8 (21.2)                         | 20.0 (28.4)                        | 16.6 (23.8)                        | 14.5 (20.6)                        |
| <b>MRI SPARCC SIJ</b>                                    | 5.0 (9.6)                           | 4.7 (11.2)                         | 6.4 (10.9)                         | 4.5 (9.1)                          |
| <b>Spinal pain</b>                                       | 7.4 (1.4)                           | 7.0 (1.6)                          | 7.1 (1.5)                          | 7.2 (1.3)                          |
| <b>Spinal pain at night</b>                              | 7.1 (1.7)                           | 6.9 (1.8)                          | 7.1 (1.7)                          | 7.0 (1.4)                          |
| <b>Bodily pain<sup>b</sup></b>                           | 35.4 (17.7)                         | 37.6 (15.7)                        | 38.0 (16.9)                        | 38.8 (16.3)                        |

Unless otherwise indicated, values are presented as mean (SD). Data are presented for patients with non-missing values.

<sup>a</sup>The placebo population excludes one patient who was a screen failure and was accidentally randomised to placebo. This patient discontinued prior to receiving study drug.

<sup>b</sup>Measured using the SF-36 PCS associated domains.

Abbreviations: ASAS, Assessment of SpondyloArthritis International Society; ASDAS, Ankylosing Spondylitis Disease Activity Score; AxSpA, Axial Spondyloarthritis; BASDAI, Bath Ankylosing Spondylitis Disease Activity Index; BASFI, Bath Ankylosing Spondylitis Functional Index; CRP, C-

reactive protein; csDMARD, conventional synthetic disease-modifying antirheumatic drug; HLA, human leukocyte antigen; MRI, magnetic resonance imaging; NRS, numeric rating scale; NSAID, nonsteroidal anti-inflammatory drug; Q2W, every two weeks; Q4W, every four weeks; SD, Standard deviation; SF-36 PCS, Medical Outcomes Study 36-item Short-Form Health Survey Physical Component Summary; SIJ, Sacroiliac joint; SPARCC, Spondyloarthritis Research Consortium of Canada.

**Figure S1. Trial Profile for COAST-V**

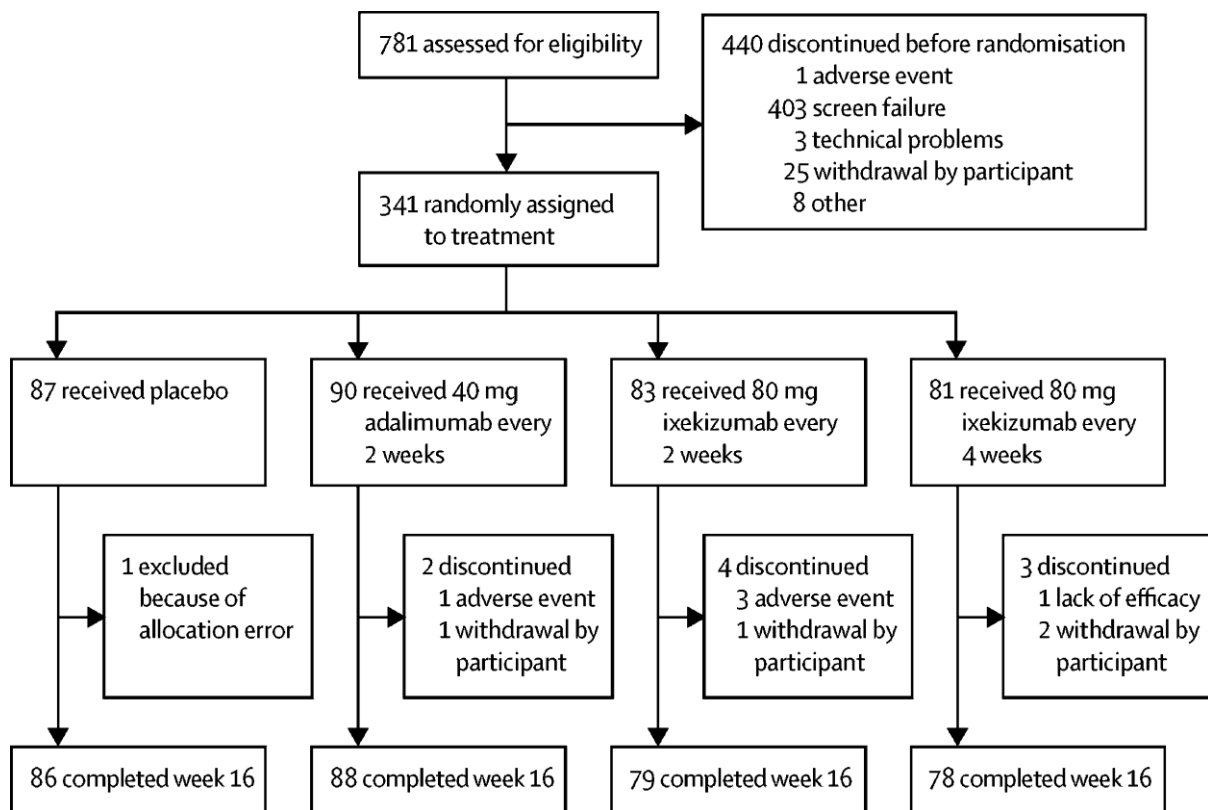

Supplement: MOESM1 [file 26994730]
